# Supplementary material
Source: Springer Nature journal article supplement (https://www.springermedizin.de/resource/supplementary/12885_2014_5161_MOESM1_ESM.pdf/9468358)

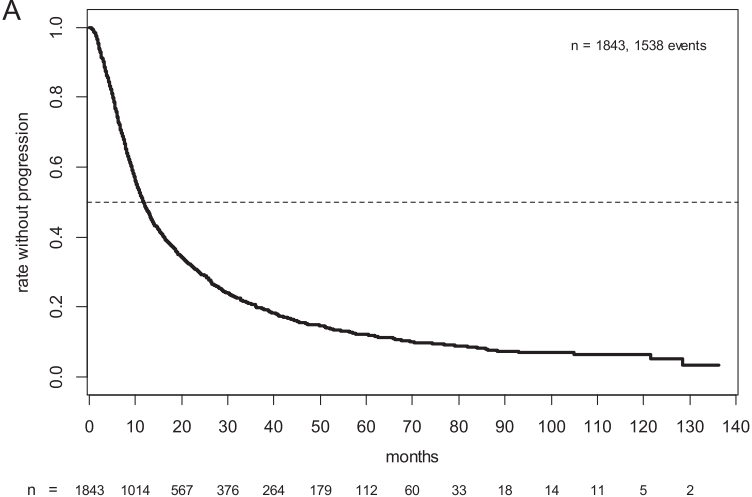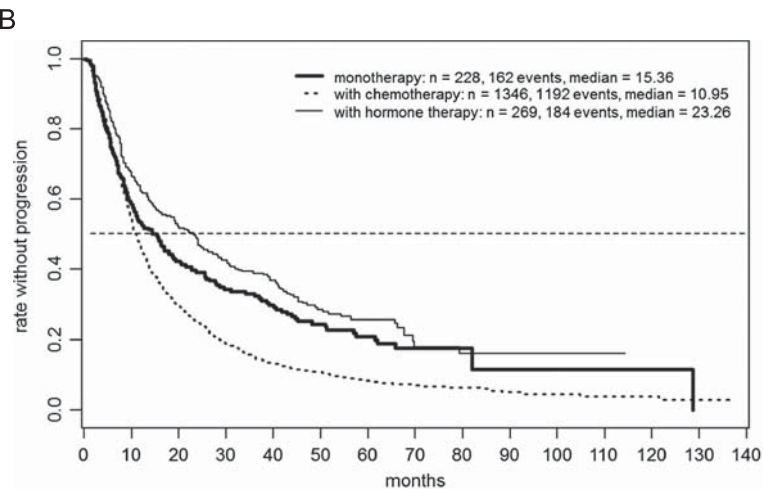

|     |     |     |    |    |    |    |    |    |   |   |   |   |   |   |                 |
|-----|-----|-----|----|----|----|----|----|----|---|---|---|---|---|---|-----------------|
| n = | 228 | 127 | 76 | 56 | 46 | 32 | 21 | 13 | 3 | 2 | 2 | 2 | 1 | 0 | ( monotherapy ) |
|-----|-----|-----|----|----|----|----|----|----|---|---|---|---|---|---|-----------------|

|     |      |     |     |     |     |     |    |    |    |    |   |   |   |   |                       |
|-----|------|-----|-----|-----|-----|-----|----|----|----|----|---|---|---|---|-----------------------|
| n = | 1346 | 710 | 370 | 227 | 147 | 101 | 62 | 35 | 22 | 11 | 8 | 6 | 4 | 2 | ( with chemotherapy ) |
|-----|------|-----|-----|-----|-----|-----|----|----|----|----|---|---|---|---|-----------------------|

|     |     |     |     |    |    |    |    |    |   |   |   |   |   |   |                          |
|-----|-----|-----|-----|----|----|----|----|----|---|---|---|---|---|---|--------------------------|
| n = | 269 | 177 | 121 | 93 | 71 | 46 | 29 | 12 | 8 | 5 | 4 | 3 | 0 | 0 | ( with hormone therapy ) |
|-----|-----|-----|-----|----|----|----|----|----|---|---|---|---|---|---|--------------------------|

Supplement: MOESM1 [file 9468358]
